# Supplementary material for: Ultra-long Sialon nanobelts: large-scale synthesis via a pressure enhanced CVD process and photoluminescence characteristics
Source: Royal Society of Chemistry journal article supplement (doi:10.1039/c0jm04247a), 2011-01-01
Supplement: c0jm04247a.pdf [file c0jm04247a.pdf]

## Electronic Supplementary Information

### (1) Raw materials details:

The molecular weight of high hydrogen containing polysiloxane(HPSO) is about 2000; the ethylenediamine(EDA) is analytically pure; the purity of Al powders is 99.9% and particle size of Al powders is 1 $\mu$ m.

### (3) More details about SiONCH sol-gel structure:

FT- IR spectrum (Figure S1) of SiONCH sol-gel shows that the products mainly contain Si-O-Si and Si-C bond. Because Si-base compound has strong FT-IR absorb effect, the characteristic absorption peaks of Si-O-Si(1100 $\text{cm}^{-1}$ ) and Si-C(1275 $\text{cm}^{-1}$ ) are much strong than hydrocarbon and some peaks of C-N (1120 $\text{cm}^{-1}$ ) are covered. The peak (2970  $\text{cm}^{-1}$ ) indicates the C-H structure of methyl. The peak (2100 $\text{cm}^{-1}$ ) indicates the Si-H structure which is residual bond of HPSO is still existed in SiONCH sol-gel. The characteristic absorption peak of Si-N bond (873 $\text{cm}^{-1}$ ) indicates the reactions are mainly dehydrocoupling of Si-H and N-H units resulting in the formation of SiONCH structure. This result can be further confirmed by mensurating H<sub>2</sub> yield.

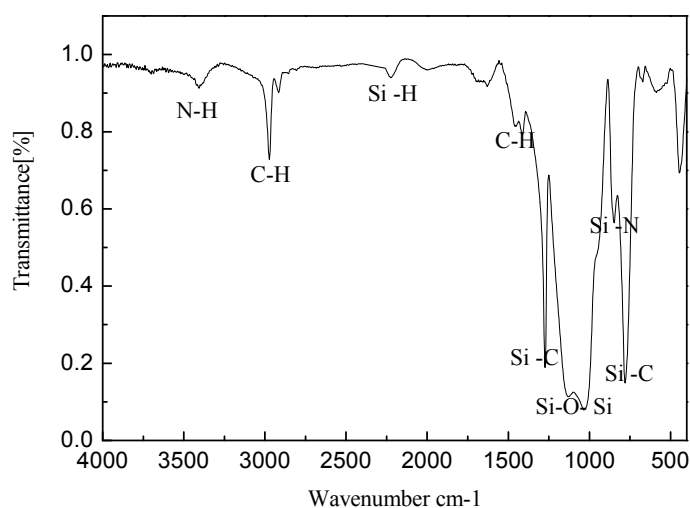

Figure S1. FT- IR spectrum of SiONCH sol-gel

More structure details can be characterized by XPS spectra of N1s and Si2p of SiONCH sol-gel. As Figure S2 shown the N1s bonding energy peak can be separated to 398.1ev and 399.1ev which are indexed to the Si-N bond and -CH<sub>2</sub>-NH<sub>2</sub>- bond respectively. Further studies of the Si2p bonding energy peak indicate that the bond energies of 100.8ev, 103.1ev and 101.9ev are indexed to the Si:(N<sub>x</sub>H<sub>y</sub>), -O-Si-O- and

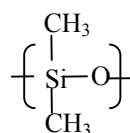

structures respectively. The results can confirm that SiONCH sol-gel mainly contain Si-O-Si and Si-C structures. The reaction can be indexed to the dehydrocoupling of Si-H and N-H units.

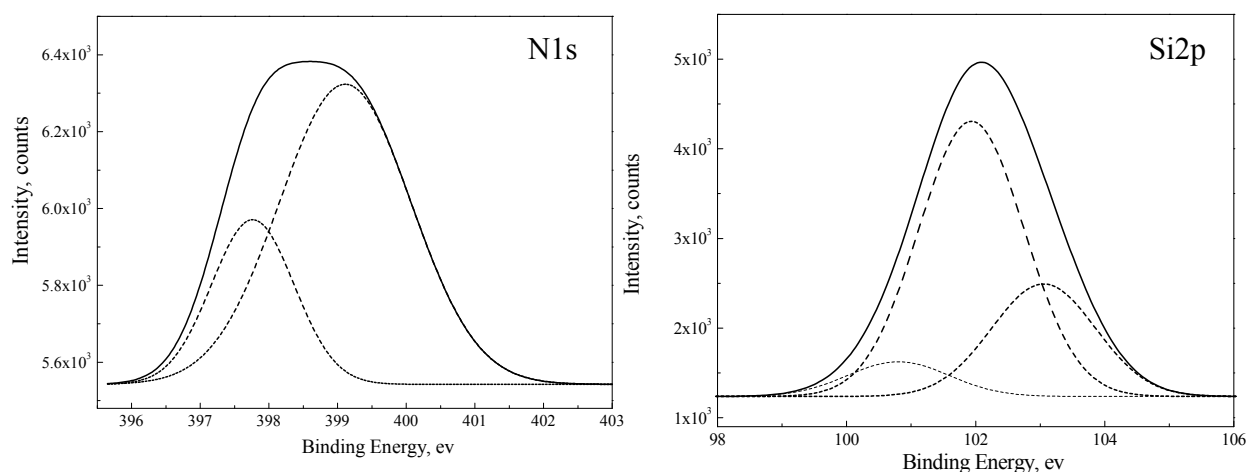

Figure S2. XPS spectra of N1s and Si2p of SiONCH sol-gel

(3) As shown in figure S3, the length of the Sialon nanobelts can be measured by drawing the entangled wool products till to a single nanobelt exposing. The total length is above 12mm.

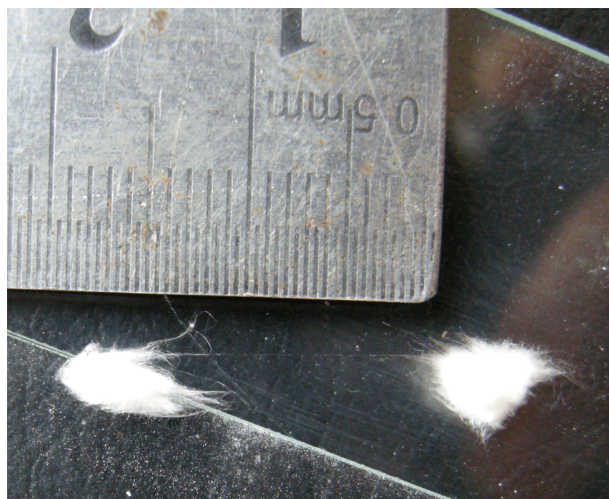

Figure S3. Photograph of the  $\beta$ -Si<sub>5</sub>AlON<sub>7</sub> nanobelts thermal treated at 1450°C for 2 hours

(4) In the pyrolysis process, decomposition and rearrangement reactions can cause raw materials to produce nano scale nucleus. As the figure S4 shown, the morphology of SiONCH-Al annulus debris thermal treated at 1000°C for 2 hours is mainly SiAlONC amorphous with slight crystallization of SiC. Further studies suggest that the particle size and C/Si ratio of SiONCH-Al structure contribute to the nucleation of Si<sub>3</sub>N<sub>4</sub>. The nucleation temperature can decrease significantly with decreasing particle size in starting powders as well as with increasing surface area of nano scale SiC. The C/Si ratio of SiONCH-Al structure is 2 that provide the possibility of forming Si<sub>3</sub>N<sub>4</sub>. If the C/Si ratio is less than 3, the reaction (2) can be possible at temperature below 1500°C.

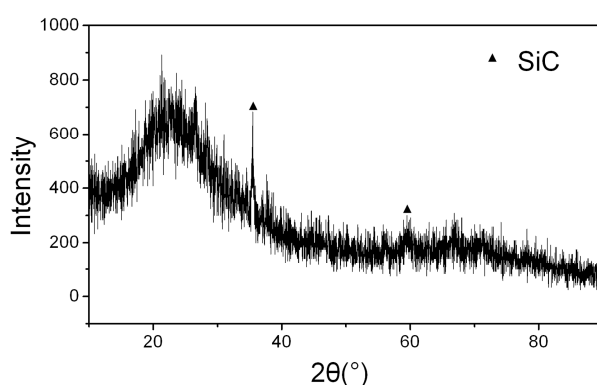

Figure S4 XRD pattern recorded from SiONCH-Al annulus debris thermal treated at 1000° C for 2 hours
